# Supplementary material
Source: bioRxiv or medRxiv preprint supplement (https://www.biorxiv.org/highwire/filestream/19546/field_highwire_adjunct_files/3/062455-4.pdf)

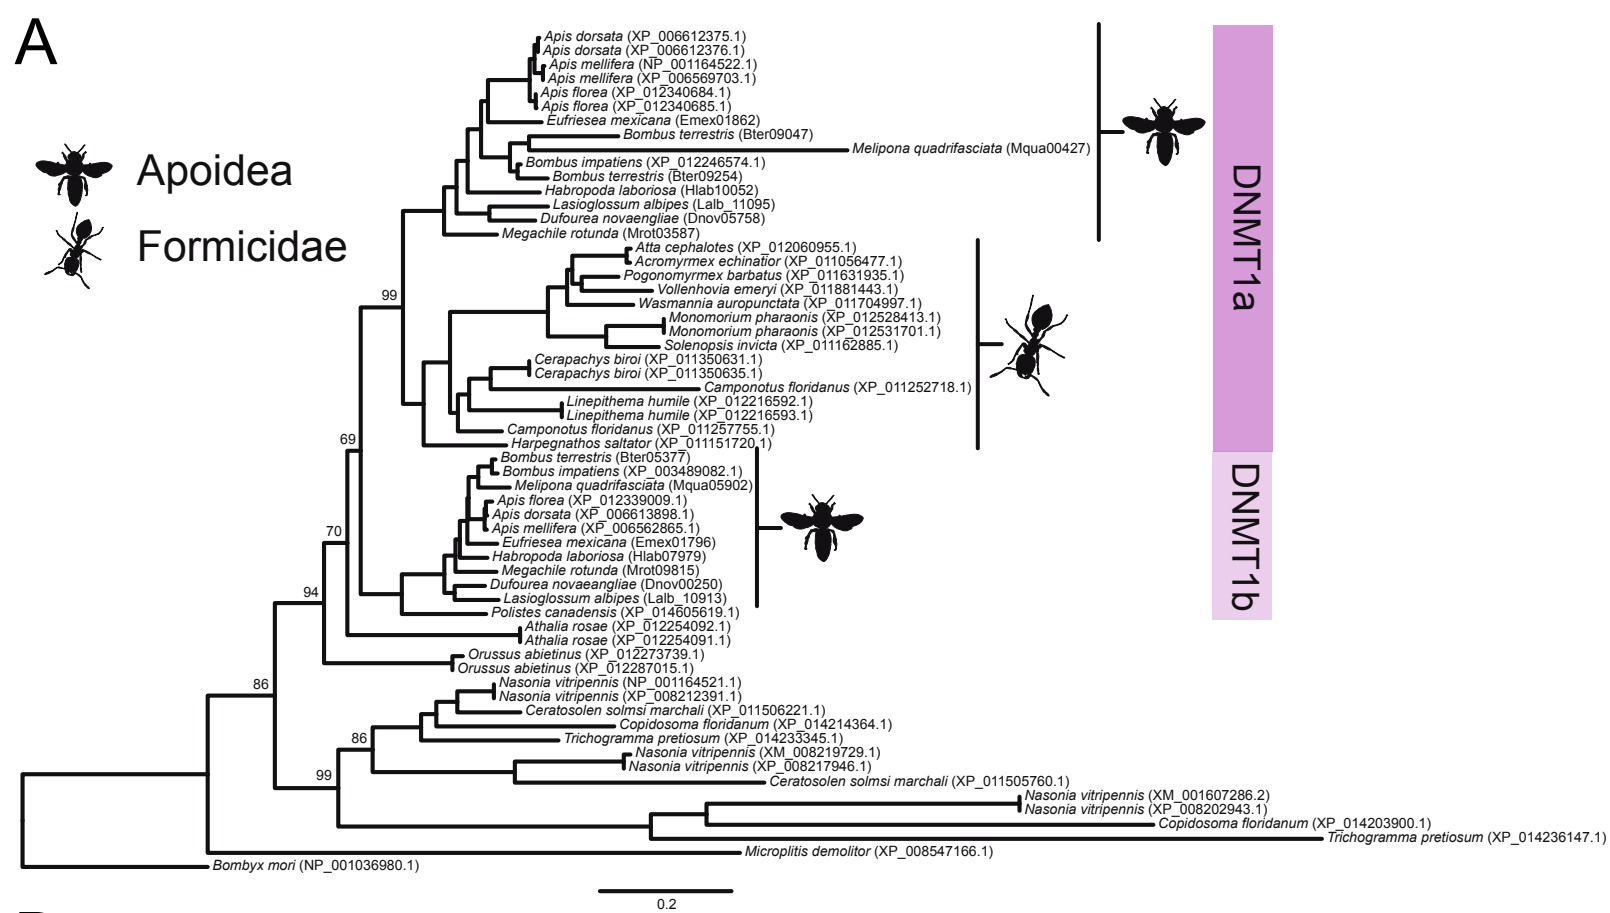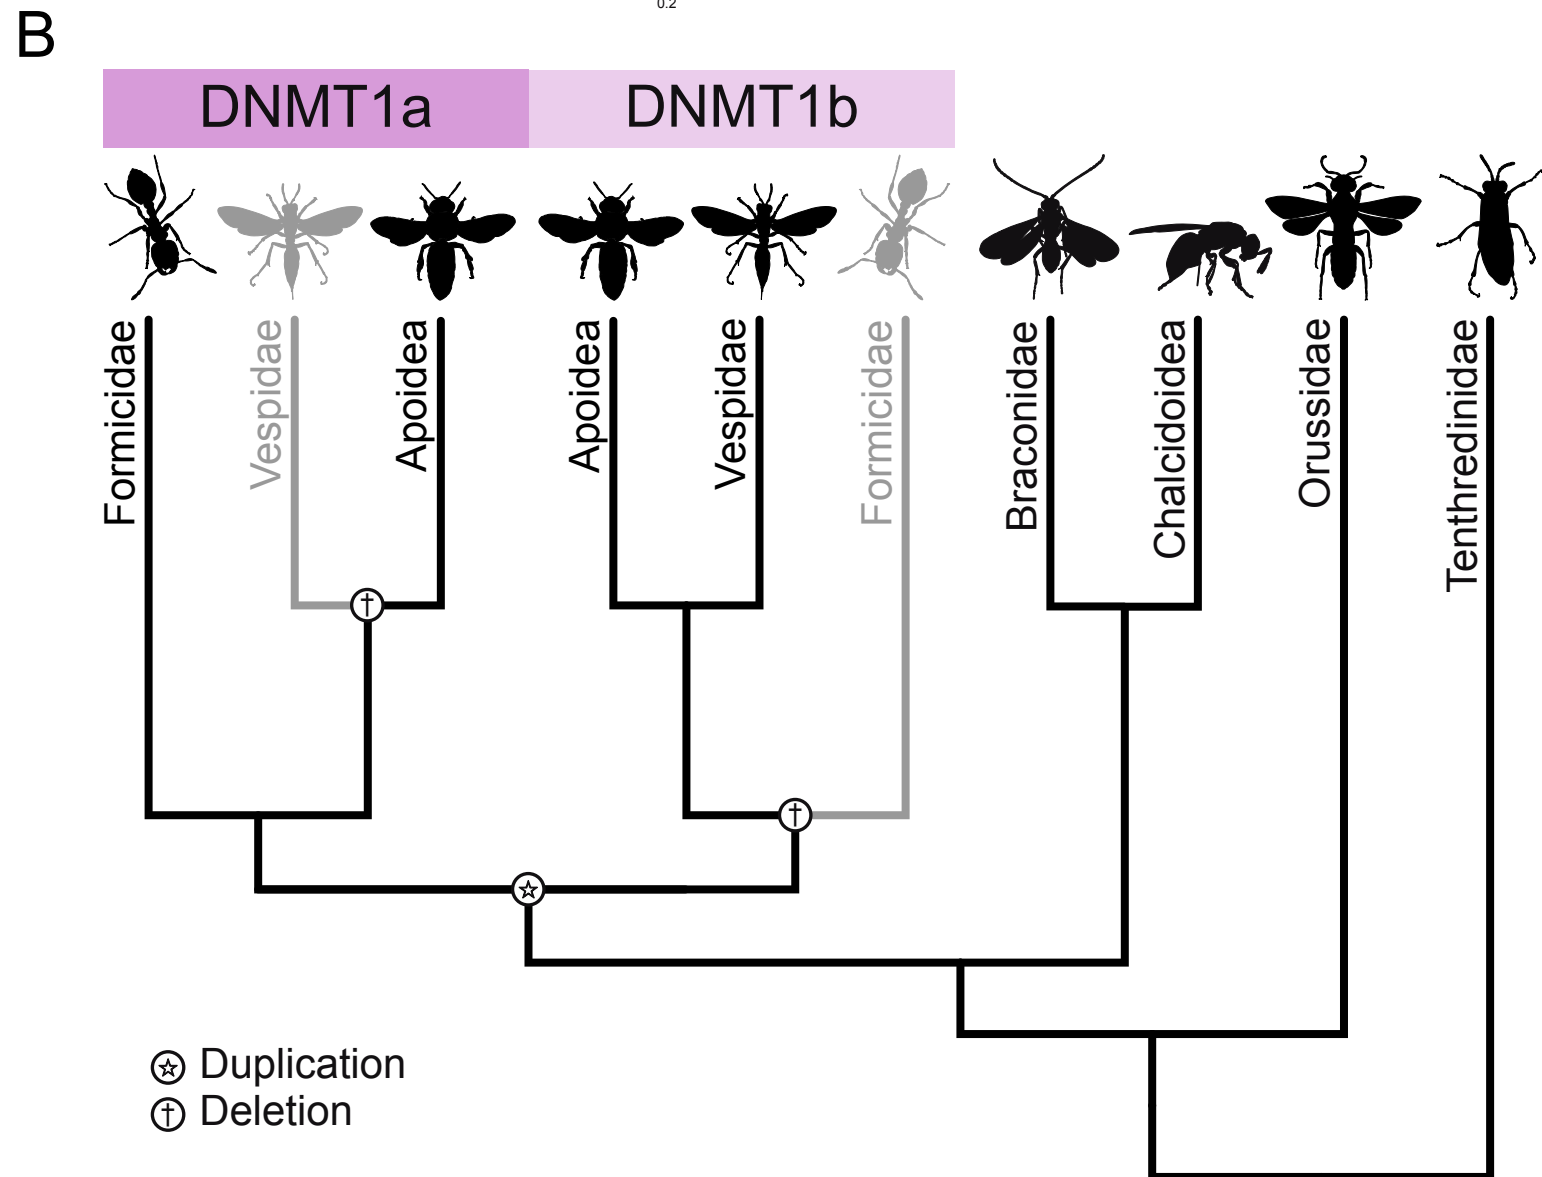

Supplement: Supplementary file [file 062455-4.pdf]
